# Supplementary material for: Altered glucocorticoid metabolism represents a feature of macroph‐aging
Source: PubMed Central journal article supplement (PMC7294787; doi:10.1111/acel.13156), 2020-05-28
Supplement: ACEL-19-e13156-s001.pdf [file ACEL-19-e13156-s001.pdf]

## Supporting information

### Altered glucocorticoid metabolism represents a feature of macroph-aging

Jenny Vanessa Valbuena Perez<sup>1\*</sup>, Rebecca Linnenberger<sup>1\*</sup>, Anna Dembek<sup>1</sup>, Stefano Bruscoli<sup>2</sup>, Carlo Riccardi<sup>2</sup>, Marcel H. Schulz<sup>3</sup>, Markus R. Meyer<sup>4</sup>, Alexandra K. Kiemer<sup>1</sup>, Jessica Hoppstädter<sup>1#</sup>

<sup>1</sup>Pharmaceutical Biology, Department of Pharmacy, Saarland University, Saarbrücken, Germany

<sup>2</sup>Pharmacology, Department of Medicine, Perugia University, Perugia, Italy

<sup>3</sup>Institute for Cardiovascular Regeneration, Goethe University Hospital, Frankfurt, Germany

<sup>4</sup>Department of Experimental and Clinical Toxicology, Institute of Experimental and Clinical Pharmacology and Toxicology, Center for Molecular Signaling (PZMS), Saarland University, Homburg, Germany

\*Equal contribution.

#Correspondence:

Jessica Hoppstädter, Ph.D.

Pharmaceutical Biology

Department of Pharmacy

Saarland University

66123 Saarbrücken, Germany

Phone: +49 681 302 57304

Fax: +49 681 302 57302

Email: [j.hoppstaedter@mx.uni-saarland.de](mailto:j.hoppstaedter@mx.uni-saarland.de)

## 1. Supplementary figures

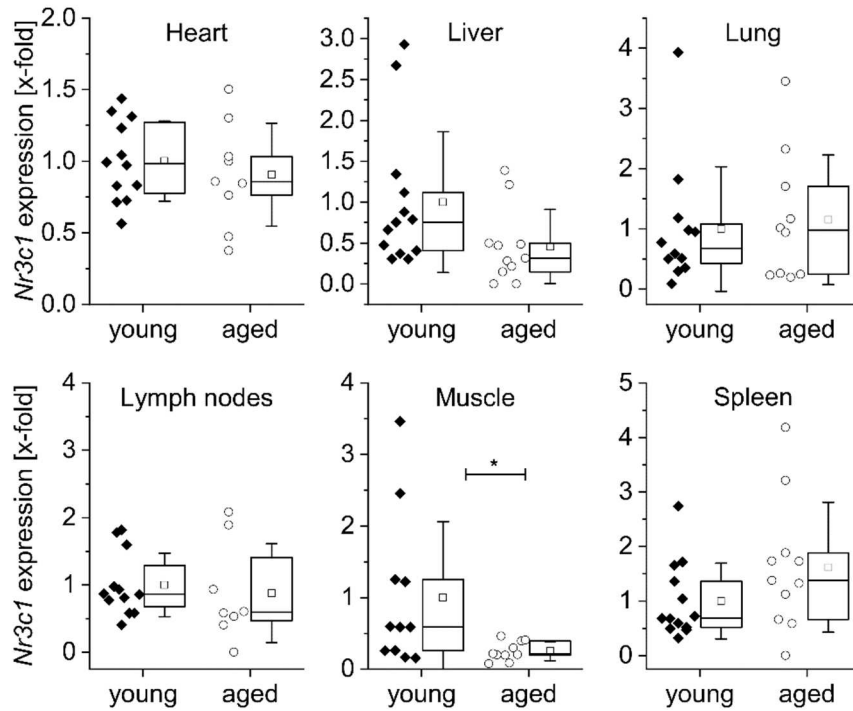

**Supplementary figure S1.** *GR* expression across tissues. *GR* (*Nr3c1*) expression in tissues from young and aged mice. mRNA expression levels were measured in heart, liver, lung, lymph nodes, skeletal muscle, and spleen tissues, normalized against the housekeeping gene *Ppia*, and expressed as x-fold of young (n=9-13). Box plots show the 25–75<sup>th</sup> percentiles (box), mean (square), median (line), and SD (whiskers). \* $p < 0.05$  relative to young mice, as determined by two-tailed t-test.

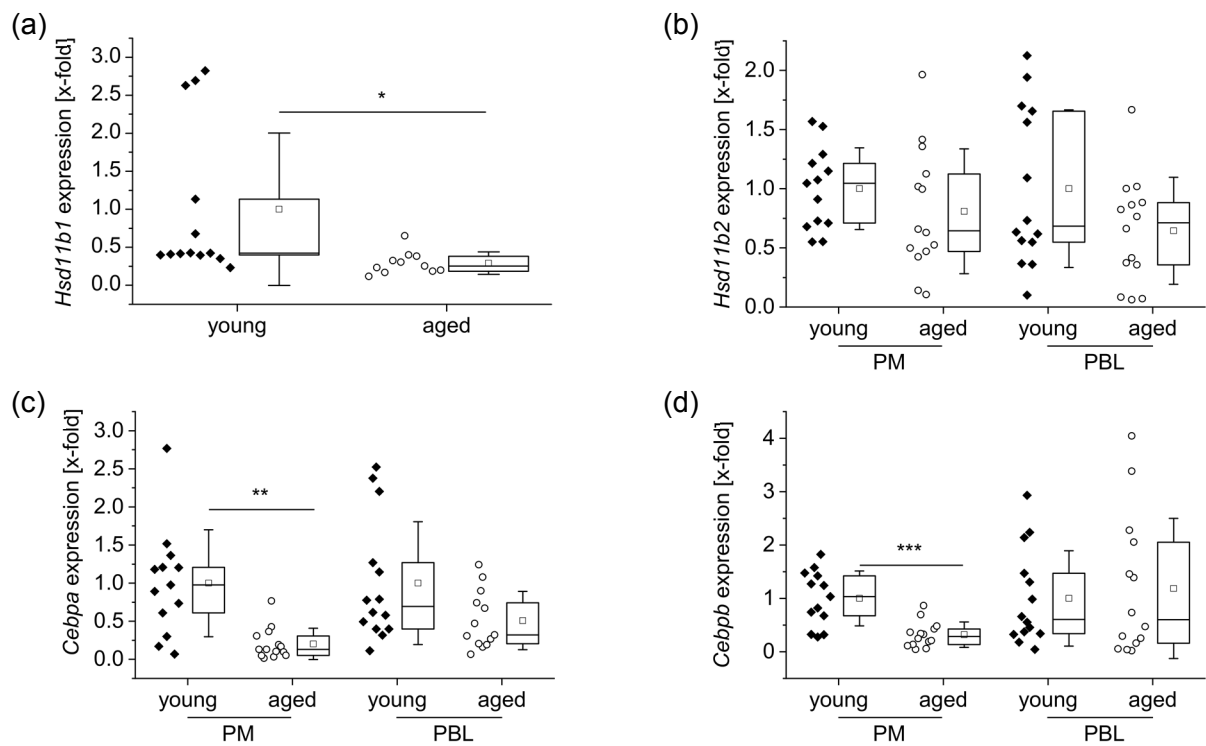

**Supplementary figure S2.** Alterations in the expression of genes involved in GC metabolism. (a) *Hsd11b1* expression in livers of young and aged mice (young: n=13, aged: n=11) was measured by qPCR, normalized to *Ppia*, and expressed as x-fold of young. (b-d): *Hsd11b2* (b), *Cebpa* (c), and *Cebpb* (d) expression levels were measured in PMs and PBLs (n=14), normalized to *Ppia*, and expressed as x-fold of young. Box plots show the 25–75th percentiles (box), mean (square), median (line), and SD (whiskers). \*p<0.05, \*\*p<0.01, \*\*\*p<0.001 by two-tailed t-test.

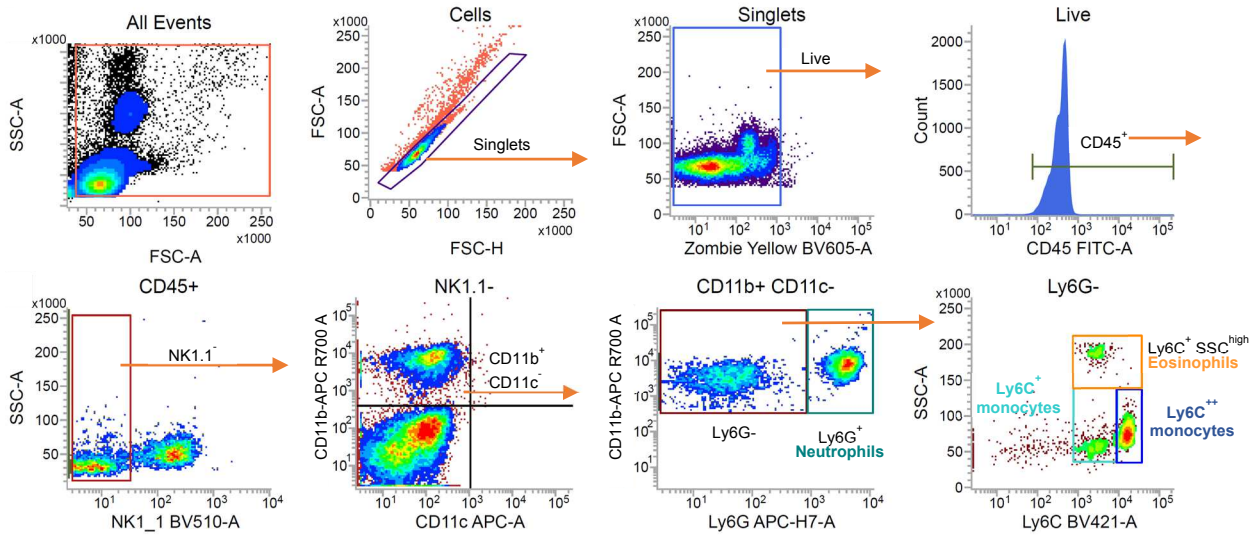

**Supplementary figure S3.** Determination of GILZ expression in myeloid cells in peripheral blood from young and aged mice. A: Gating strategy for the quantification of GILZ in myeloid cells from tail vein blood. Gates were set using fluorescence minus one (FMO) controls (not shown).

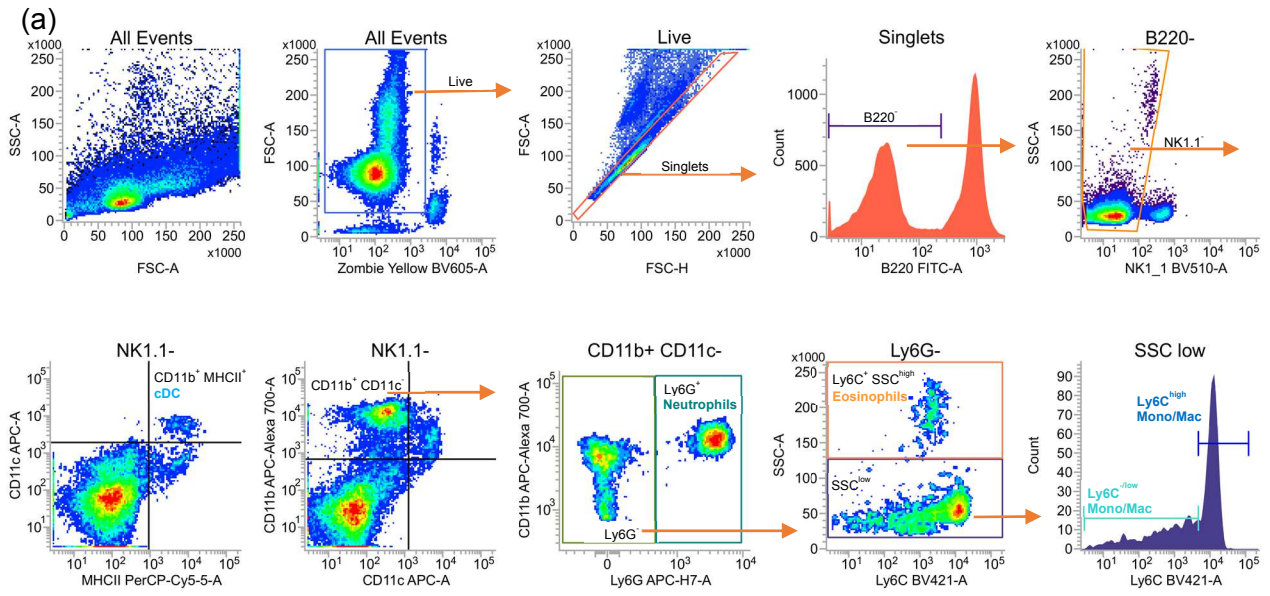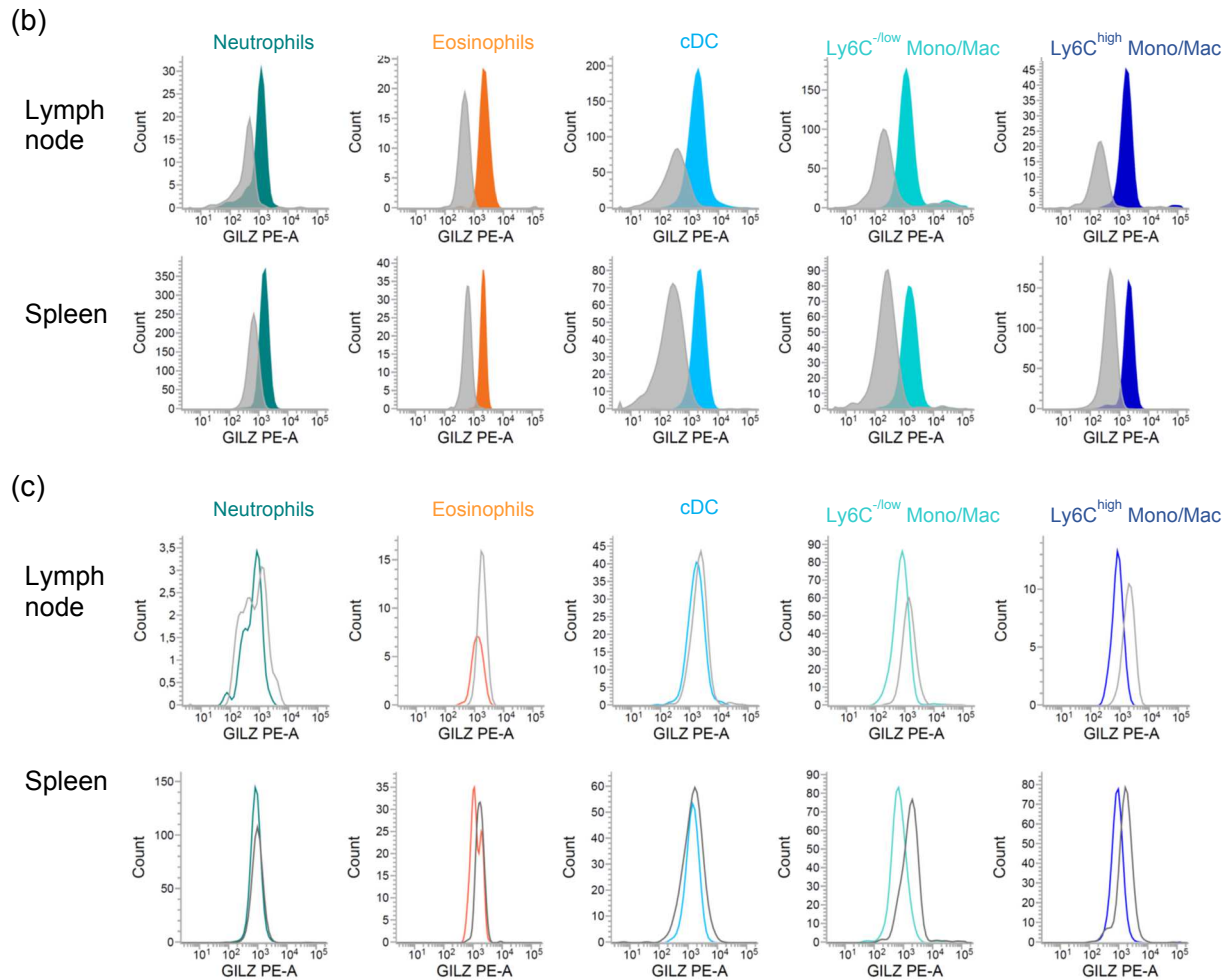

**Supplementary figure S4.** Determination of GILZ expression in myeloid cells in lymphoid tissues from young and aged mice. (a) Gating strategy for the quantification of GILZ in myeloid cells from lymphoid tissues. Gates were set using fluorescence minus one (FMO) controls (not shown). (b) Representative histograms showing GILZ expression in myeloid subsets in young mice. Colored: GILZ signal, gray: isotype control. (c) Representative histograms showing GILZ signals in cells from aged and young mice. Gray line: young; colored line: aged.

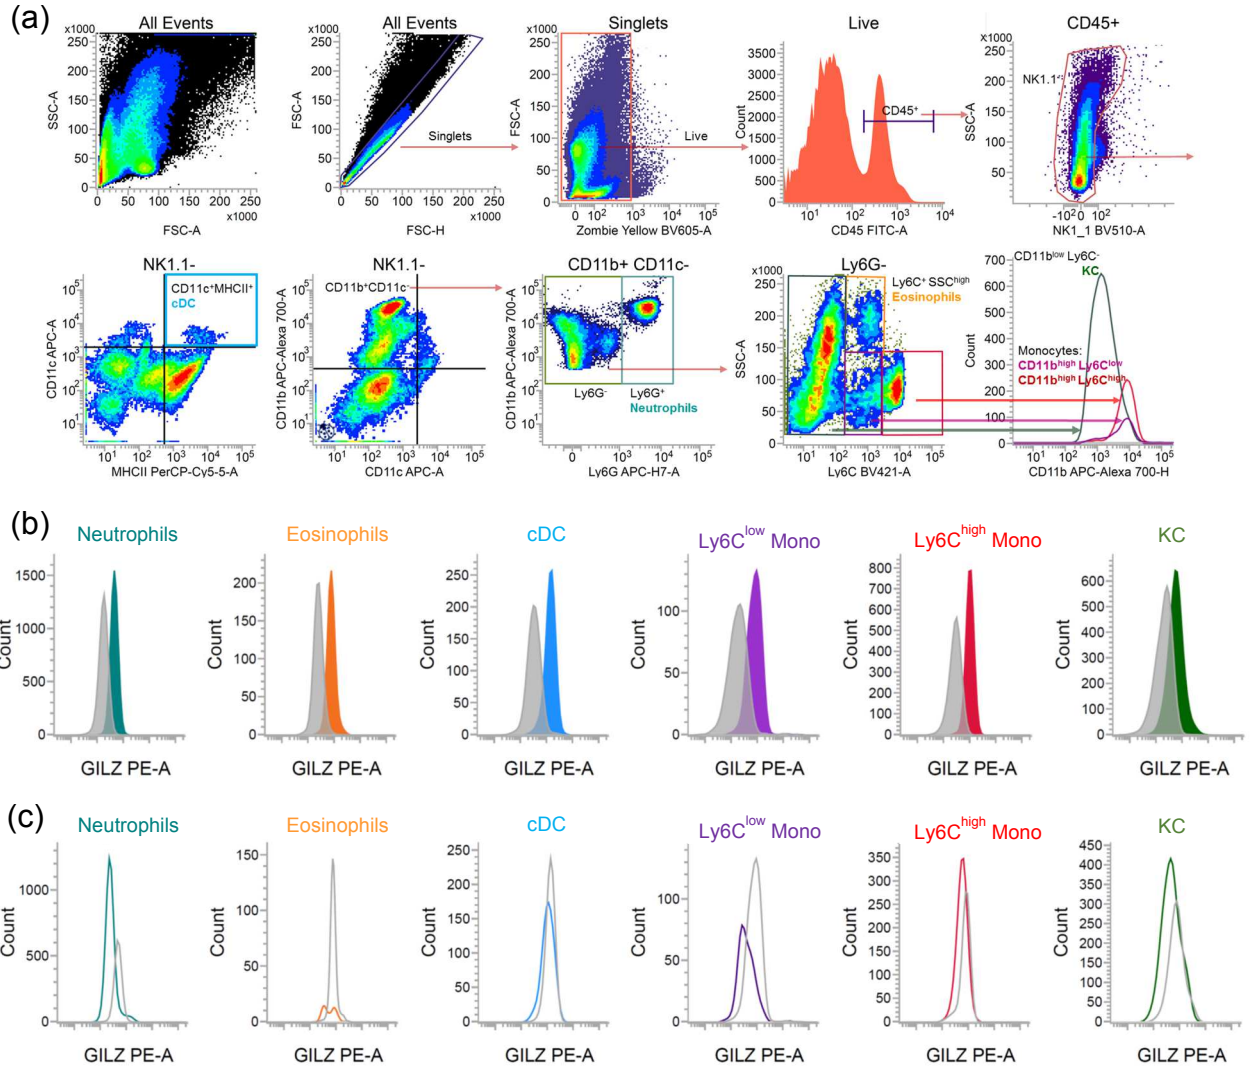

**Supplementary figure S5.** Determination of GILZ expression in myeloid cells in liver tissue from young and aged mice. (a) Gating strategy for the quantification of GILZ in myeloid cells from liver tissue. Gates were set using fluorescence minus one (FMO) controls (not shown). (b) Representative histograms showing GILZ expression in myeloid subsets in young mice. Coloured: GILZ signal, gray: isotype control. (c) Representative histograms showing GILZ signals in cells from aged and young mice. Gray line: young; colored line: aged.

## 2. Supplementary tables

**Supplementary table S1: qPCR conditions.**

| Gene                      | NCBI<br>Accession<br>number | Forward primer<br>sequence 5'-3' | Reverse primer sequence<br>5'-3' | µl primer<br>[10 µM] /<br>20 µl<br>reaction | Annealing<br>T (°C) |
|---------------------------|-----------------------------|----------------------------------|----------------------------------|---------------------------------------------|---------------------|
| <i>Human</i>              |                             |                                  |                                  |                                             |                     |
| <i>ACTB</i>               | NM_001101.3                 | TGCGTGACATTAAGG<br>AGAAG         | GTCAGGCAGCTCGTA<br>GCTCT         | 0.5                                         | 60                  |
| <i>ANXA1</i>              | NM_000700.3                 | CTCACAGCTATCGTGA<br>AGTGC        | TGCCTTATGGCGAGTT<br>CCAA         | 0.5                                         | 60                  |
| <i>DUSP1</i>              | NM_004417.4                 | CAGCTGCTGCAGTTT<br>GAGTC         | AGGTAGCTCAGCGCA<br>CTGTT         | 0.5                                         | 60                  |
| <i>SGK1</i>               | NM_005627.4                 | GGACTCTGCAAGGAG<br>AACATTG       | GCTGCTTATGAAGCAC<br>CTCAG        | 0.5                                         | 60                  |
| <i>TSC22D3<br/>(GILZ)</i> | NM_004089.3                 | TCCTGTCTGAGCCCTG<br>AAGAG        | AGCCACTTACACCGCA<br>GAAC         | 0.5                                         | 60                  |
| <i>Mouse</i>              |                             |                                  |                                  |                                             |                     |
| <i>Abca1</i>              | NM_013454.3                 | ACAAGTCCATCGTGTC<br>TCGC         | GGGATGCTTGATCTGC<br>CGTA         | 0.5                                         | 60                  |
| <i>Abcg1</i>              | NM_009593.2                 | ACACCGATGTGAACC<br>CGTTT         | CAGATGTGTCAGGAC<br>CGAGT         | 0.5                                         | 60                  |
| <i>ApoE</i>               | NM_009696.3                 | CAGTGGCCCAAGGAGA<br>ATCAAT       | TCACAGAGACTCAGA<br>ATGTGC        | 0.5                                         | 60                  |
| <i>Cdkn1a</i>             | NM_007669.5                 | GACCAGCCTGACAGA<br>TTTCTA        | TGGGCACTTCAGGGTT<br>TTCT         | 0.5                                         | 60                  |
| <i>Cdkn2a</i>             | NM_009877.2                 | CGGGGACATCAAGAC<br>ATCGT         | GCCGGATTTAGCTCTG<br>CTCT         | 0.5                                         | 60                  |
| <i>Cebpa</i>              | NM_0012875<br>23.1          | TTCGGGTCGCTGGATC<br>TCTA         | TCAAGGAGAAACCAC<br>CACGG         | 0.5                                         | 60                  |
| <i>Cebpb</i>              | NM_0012877<br>39.1          | GGAGACGCAGCACAA<br>GGT           | AGCTGCTTGAACAAG<br>TTCCG         | 0.5                                         | 60                  |
| <i>Csnk2a2</i>            | NM_009974.3                 | GTAAAGGACCCTGTGT<br>CAAAGA       | GTCAGGATCTGGTAG<br>AGTTGCT       | 0.8                                         | 60                  |
| <i>Cyp11a2</i>            | NM_019779.4                 | ATGAGATCCCTTCCCC<br>TGGC         | TGCCAGCTTCTCCCT<br>GTAAA         | 0.5                                         | 60                  |
| <i>Hmgcr</i>              | NM_008255.2                 | ATCCAGGAGCGAACC<br>AAGAGAG       | CAGAAGCCCCAAGCA<br>CAAAC         | 0,5                                         | 60                  |
| <i>Hsd11b1</i>            | NM_008288.2                 | GGAACCCAGGAAGGA<br>AGATCA        | CAGGCAGGACTGTTCT<br>AAGAC        | 0.5                                         | 60                  |
| <i>Hsd11b2</i>            | NM_008289.2                 | AACCTCTGGGAGAAA<br>CGCAAG        | GGCATCTACAAGTGG<br>GCTAAGG       | 0.5                                         | 60                  |
| <i>Il1b</i>               | NM_008361.3                 | CCAAAAGATGAAGGG<br>CTGCTT        | GGAAGGTCCACGGGA<br>AAGAC         | 0.5                                         | 60                  |
| <i>Il6</i>                | NM_031168.2                 | AAGAAATGATGGATG<br>CTACCAAACTG   | GTACTIONCAGAAGACC<br>AGAGGAAATT  | 0.4                                         | 60                  |

|                                   |             |                              |                               |     |    |
|-----------------------------------|-------------|------------------------------|-------------------------------|-----|----|
| <i>Ldlr</i>                       | NM_010700.3 | TCAATGGGGGCAATC<br>GGAAA     | ACACTTTGTCCTCATA<br>GATGGC    | 0.5 | 60 |
| <i>Nr3c1</i>                      | NM_008173.3 | AAAGAGCTAGGAAAA<br>GCCATTGTC | TCAGCTAACATCTCTG<br>GGAATTCA  | 0.5 | 61 |
| <i>Ppia</i>                       | NM_008907.1 | GGCCGATGACGAGCC<br>C         | TGTCTTTGGAACTTTG<br>TCTGC     | 0.5 | 58 |
| <i>Scarb1</i>                     | NM_016741.2 | TCCTGAAGACACTATA<br>AGCCCC   | GTGCGGACAGGTGTG<br>ACAT       | 0.5 | 60 |
| <i>Sirt1</i>                      | NM_019812.3 | TGGAGCAGGTTGCAG<br>GAATC     | GGCACCGAGGAACTA<br>CCTGAT     | 0.5 | 60 |
| <i>Stard1</i>                     | NM_011485.5 | TGTACCAAGCGCAGA<br>GGTTC     | GGCCGTGTTTCAGCTCT<br>GATG     | 0.5 | 60 |
| <i>Tnf</i>                        | NM_013693.2 | CCATTCTGAGTTCTG<br>CAAAGG    | AGGTAGGAAGGCCTG<br>AGATCTTATC | 0.5 | 60 |
| <i>Tsc22d3</i><br>( <i>Gilz</i> ) | NM_010286.4 | GCTGCTTGAGAAGAA<br>CTCCCA    | GAACTTTCCAGTTGC<br>TCGGG      | 0.5 | 60 |

**Supplementary table S2: Antibody cocktails.** All antibodies were used at a final concentration of 5 µg/ml.

| <b>Extracellular staining cocktail</b> |                             |
|----------------------------------------|-----------------------------|
| <i>Peripheral blood / Liver</i>        | <i>Lymphoid tissues</i>     |
| CD45-FITC                              | CD45R/B220-FITC             |
| NK-1.1Brilliant Violet™ 510            | NK-1.1Brilliant Violet™ 510 |
| CD11c-APC                              | CD11c-APC                   |
| CD11b-APC-R700                         | CD11b-APC-R700              |
| I-A/I-EPerCP-Cy™5.5                    | I-A/I-EPerCP-Cy™5.5         |
| Ly-6G-APC-H7                           | Ly-6G-APC-H7                |
| Ly-6C-Brilliant Violet™ 421            | Ly-6C-Brilliant Violet™ 421 |
